# Supplementary material
Source: PubMed Central journal article supplement (PMC4694017)

**A****LB medium**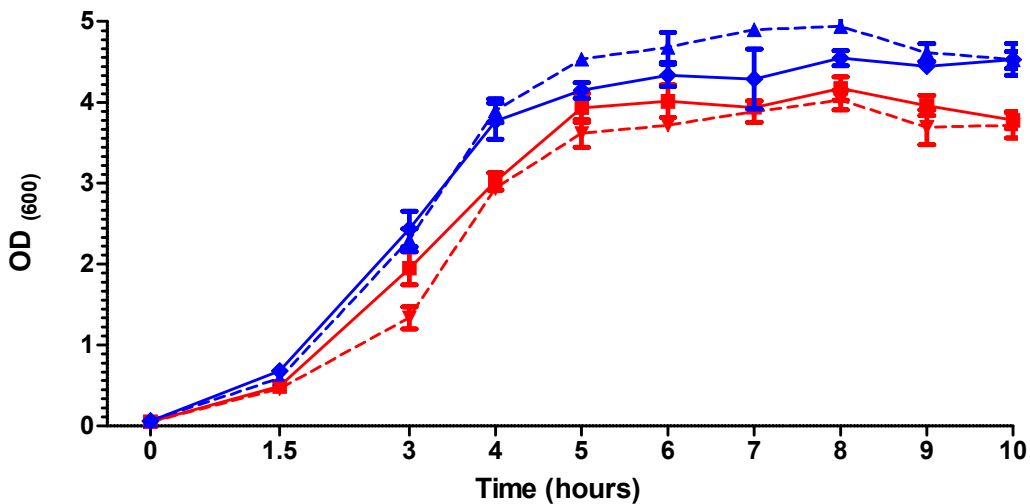

- ◆ 87541
- ▲ 85982/ pWSK29:: *dksA*<sub>87541</sub>
- ▼ 85982/ pwsk29
- 85982

**B****M9 medium**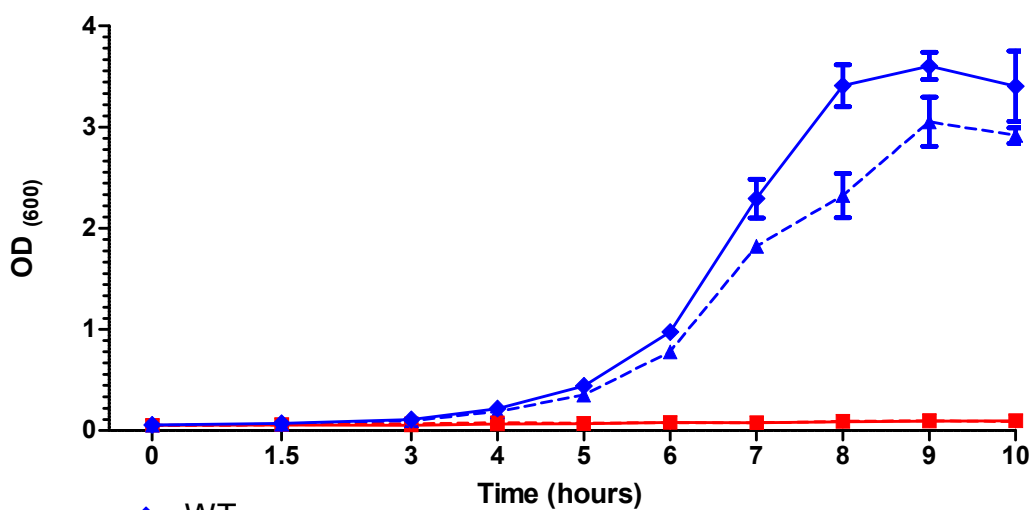

- ◆ WT
- ▲ *dksA*/ pWSK29::*dksA*
- ▼ *dksA*/ pWSK29
- *dksA*

Supplement: IAI.01135-15_zii999091552so2.pdf [file IAI.01135-15_zii999091552so2.pdf]

**A**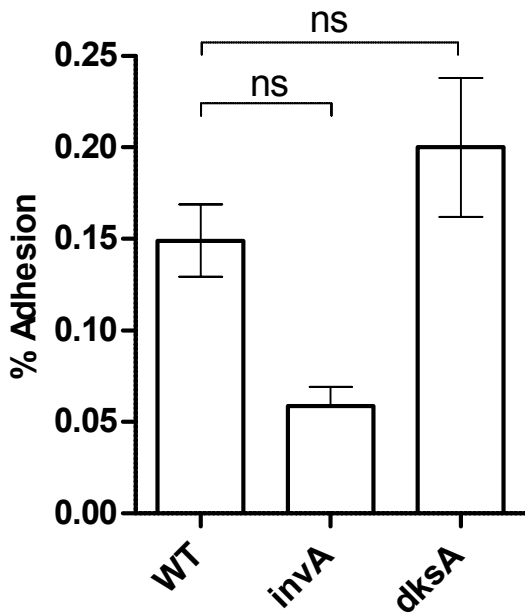

Caco-2 adhesion

**B**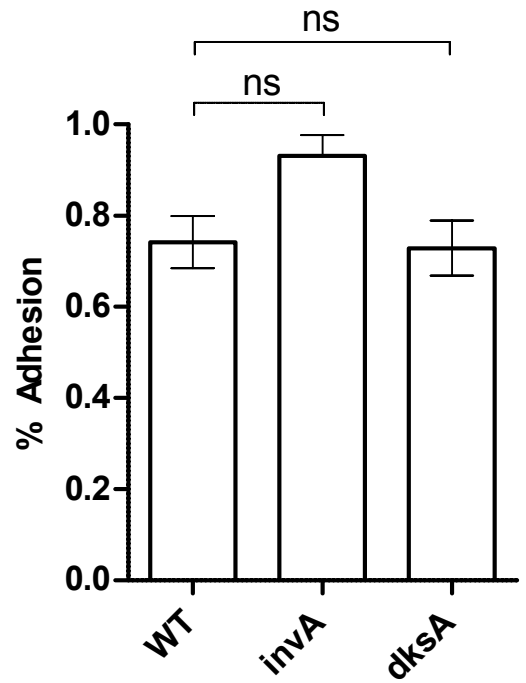

Raw 264.7 adhesion

**C**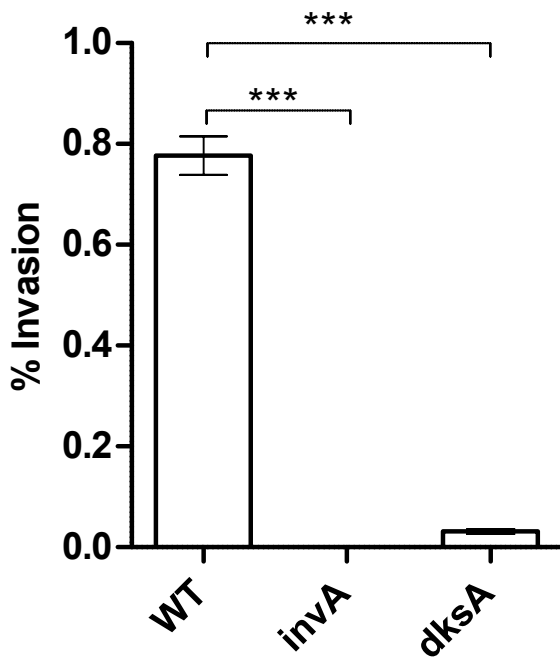

HeLa cells invasion following centrifugation

Supplement: IAI.01135-15_zii999091552so3.pdf [file IAI.01135-15_zii999091552so3.pdf]
